# Supplementary material
Source: Royal Society of Chemistry journal article supplement (doi:10.1039/d6qm00202a)
Supplement: d6qm00202a3.pdf [file d6qm00202a3.pdf]

## *Supporting Information*

### **Biodegradable Single-Electrode Triboelectric Nanogenerator for Self-Powered Robotic Texture Sensing**

<sup>1</sup>Sugato Hajra, <sup>2</sup>Shibam Pal, <sup>1</sup>Kushal Ruthvik Kaja, <sup>1</sup>Yoobin Choi, <sup>1</sup>Swati Panda, <sup>3</sup>Basanta Kumar Panigrahi, <sup>1\*</sup>Hoe Joon Kim, <sup>2\*</sup>Anna Finne Wistrand

<sup>1</sup>Department of Robotics and Mechatronics Engineering, Daegu Gyeongbuk Institute of Science and Technology, Daegu 42988, Republic of Korea

<sup>2</sup>Department of Fibre and Polymer Technology, KTH Royal Institute of Technology, Stockholm 11428, Sweden

<sup>3</sup>Department of Electrical Engineering, Siksha O Anusandhan University, Bhubaneswar-751030, India

\*Corresponding Authors:

***Professor Anna Finne Wistrand:*** [annaf@kth.se](mailto:annaf@kth.se)

***Professor Hoe Joon Kim:*** [joonkim@dgist.ac.kr](mailto:joonkim@dgist.ac.kr)

## *Supporting Information*

**Table T1:** comparison table to showcase the output performance of the biodegradable polymer TENG with present study

| Material                                                                                                    | Operating Mode          | Electrical Output                    | Application                                          | Ref.      |
|-------------------------------------------------------------------------------------------------------------|-------------------------|--------------------------------------|------------------------------------------------------|-----------|
| Silk fibroin, polyacrylamide, graphene oxide, and poly(3,4-ethylenedioxythiophene): poly(styrene sulfonate) | Single electrode mode   | 12 V<br>0.4 $\mu$ A                  | Pressure sensor for body movements                   | [1]       |
| Fish gelatin (FG) film and poly(tetrafluoroethylene)/ poly(dimethyl siloxane) (PTFE/PDMS) composite film    | Contact separation mode | 130 V<br>0.35 $\mu$ A                | Real-time respiratory monitoring                     | [2]       |
| PLA, PEDOT:PSS                                                                                              | Contact separation mode | 0.92 $\mu$ A                         | Energy Harvesting                                    | [3]       |
| Nitro-CNF, methyl-CNF                                                                                       | Contact separation mode | 8 V, 9 $\mu$ A                       | Energy Harvesting                                    | [4]       |
| PLA-PDMS                                                                                                    | Contact separation mode | 70 V<br>800 nA                       | Self-powered biosensor                               | [5]       |
| PCL-MoS <sub>2</sub> / Nylon 66                                                                             | Contact separation mode | 127 V<br>1.22 $\mu$ A                | Self-powered traffic and Parking Management System   | [6]       |
| PCL/ starch solutions                                                                                       | Contact separation mode | 50 V<br>1 $\mu$ A                    | Powering of electronics                              | [7]       |
| cellulose filter paper - Ti <sub>0.8</sub> O <sub>2</sub> nanosheets                                        | Contact separation mode | 42 V<br>1 $\mu$ A cm <sup>-2</sup>   | Powering of electronics                              | [8]       |
| AgNWs/CNF paper                                                                                             |                         | 20 V<br>0.3 $\mu$ A cm <sup>-2</sup> | Powering of electronics                              | [9]       |
| PCL/Al                                                                                                      | Single electrode mode   | 118 V<br>772 nA                      | Self-powered texture recognition for tactile sensing | This work |

## References

- [1] F. He, X. You, H. Gong, Y. Yang, T. Bai, W. Wang, W. Guo, X. Liu, M. Ye, *ACS Applied Materials & Interfaces*, 12 (2020) 6442–6450.
- [2] Y. Han, Y. Han, X. Zhang, L. Li, C. Zhang, J. Liu, G. Lu, H.-D. Yu, W. Huang, *ACS Applied Materials & Interfaces*, 12 (2020) 16442–16450.
- [3] X. Gao, L. Huang, B. Wang, D. Xu, J. Zhong, Z. Hu, L. Zhang, J. Zhou, *ACS Applied Materials & Interfaces*, 8 (2016) 35587–35592.
- [4] C. Yao, X. Yin, Y. Yu, Z. Cai, X. Wang, *Advanced Functional Materials*, 27 (2017) 1700794.
- [5] S. Panda, S. Hajra, H.G. Kim, H. Jeong, P.G.R. Achary, S. Hong, B. Dudem, S.R.P. Silva, V. Vivekananthan, H.J. Kim, *Journal of Materials Chemistry B*, 11 (2023) 10147–10157.
- [6] S. S, A.M. Chandran, S. Varun, M.V.P. Kumar, P.K.S. Mural, *ACS Applied Electronic Materials*, 6 (2024) 8987–8997.
- [7] G. Khandelwal, N.P.M. Joseph Raj, N.R. Alluri, S.-J. Kim, *ACS Sustainable Chemistry & Engineering*, 9 (2021) 9011–9017.
- [8] S. Sriphan, T. Charoonsuk, T. Maluangnont, P. Pakawanit, C. Rojviriyaa, N. Vittayakorn, *Advanced Materials Technologies*, 5 (2020) 2000001.
- [9] I. Kim, H. Jeon, D. Kim, J. You, D. Kim, *Nano Energy*, 53 (2018) 975–981.

## *Supporting Information*

**Table T2:** summary table presenting the glass transition temperature ( $T_g$ ), melting temperature ( $T_m$ ), and crystallinity of the polymer samples studied.

| <b>Polymer</b> | <b><math>T_g</math> (°C)</b> | <b><math>T_m</math> (°C)</b> | <b>Crystallinity %</b> |
|----------------|------------------------------|------------------------------|------------------------|
| PLA            | 40.0                         | 155.9                        | 26.0                   |
| PCL            | -                            | 56.2                         | 64.9                   |
| PTMC           | 27.7                         | 164.6                        | 3.4                    |

## Supporting Information

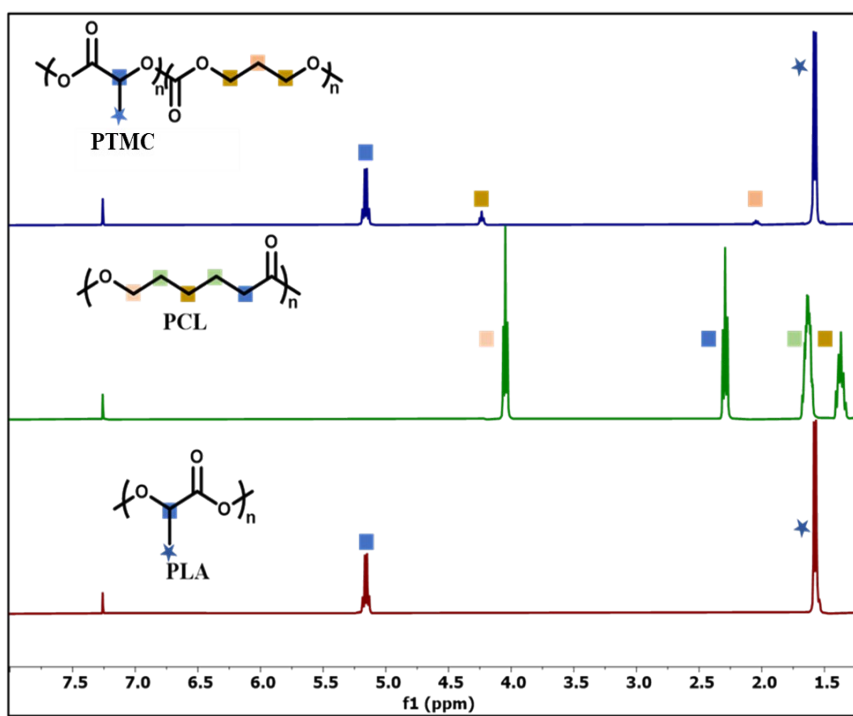

**Figure S1:** NMR spectra of PLA, PCL, and PTMC biodegradable polymers.

*Supporting Information*

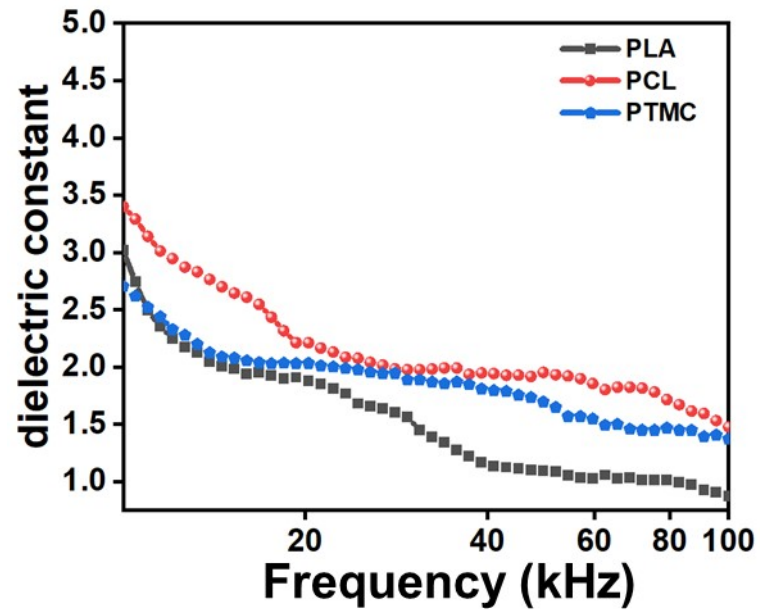

**Figure S2:** Dielectric constant of the PLA, PCL, and PTMC biodegradable polymers

## Supporting Information

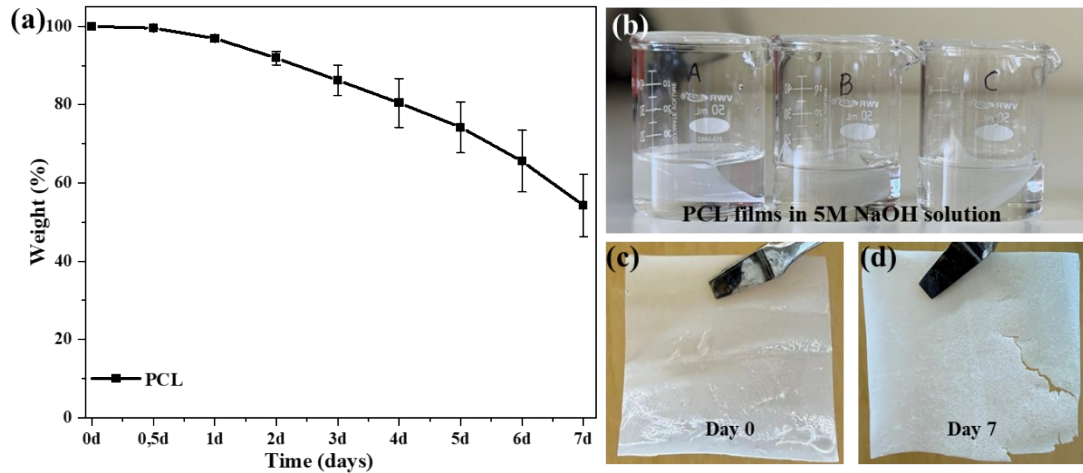

**Figure S3:** (a) degradation of the ( $3 \times 3 \text{ cm}^2$ ) PCL film in 5M NaOH solution, (b) the photograph of the PCL film immersed in the 5M NaOH solution, (c) initial photograph of the PCL film, and (d) after 7 days

### Accelerated Degradation study of PCL film in 5M NaOH solution

A 5 M NaOH solution was prepared. The PCL films were cut into  $3 \times 3 \text{ cm}^2$  pieces, and their initial weights were recorded. Each film was then immersed in 10 mL of the NaOH solution in a 50 mL beaker. At the same time intervals, the films were removed, thoroughly washed with deionized water, and gently wiped dry using tissue paper. The film weights were then measured. The percentage weight loss was calculated and plotted as a function of time:

$$\text{Weight loss} = ((\text{Final weight})/(\text{Initial weight})) \times 100$$

After each measurement, the films were re-immersed in the NaOH solution. The NaOH solution was refreshed every two days throughout the experiment. The experiment was performed in triplicate.

*Supporting Information*

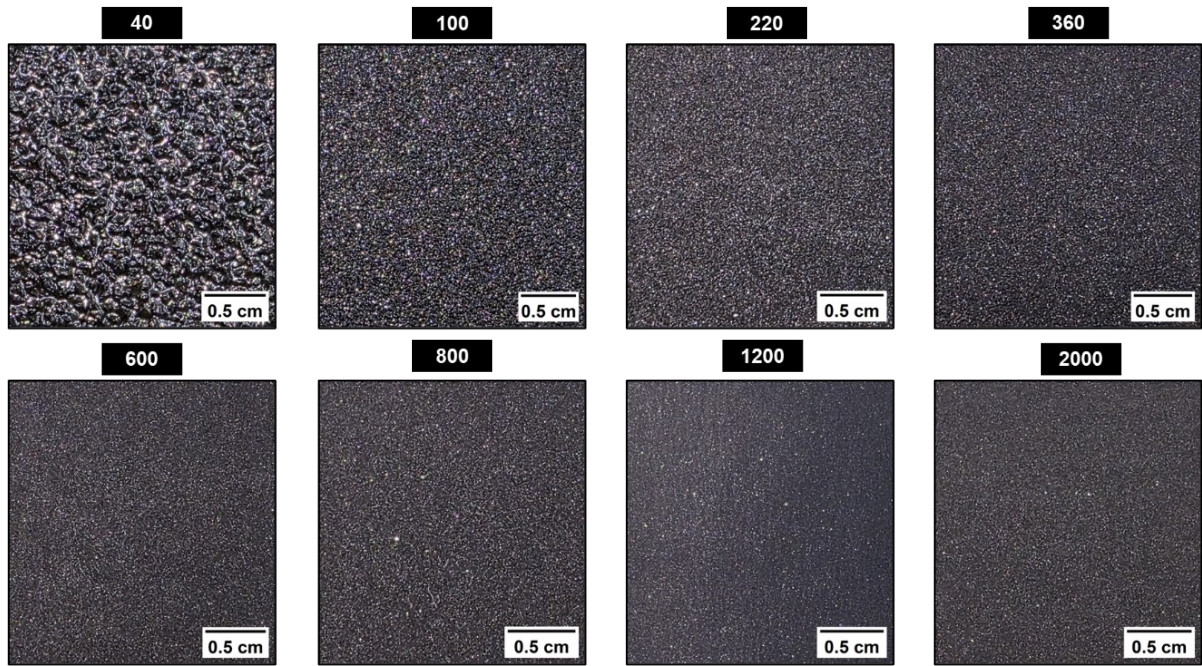

**Figure S4:** Optical image morphology of the various sandpapers.
